# Supplementary material
Source: PubMed Central journal article supplement (PMC7427892)
Supplement: 43058_2020_39_MOESM3_ESM.pdf [file 43058_2020_39_MOESM3_ESM.pdf]

**APPROVAL OF NEW STUDY****DATE:** March 23, 2020**TO:** Dr. Justin Smith  
**FROM:** Office of the IRB**DETERMINATION DATE:** 3/23/2020**APPROVAL DATE:** 3/23/2020

The Northwestern University IRB reviewed and approved the submission described below:

|                         |                                                                                                                                                                                                                                                                                                                                                                                                                                                                                                                                                                                                                                                                                                                                                                                                                                                                                                      |
|-------------------------|------------------------------------------------------------------------------------------------------------------------------------------------------------------------------------------------------------------------------------------------------------------------------------------------------------------------------------------------------------------------------------------------------------------------------------------------------------------------------------------------------------------------------------------------------------------------------------------------------------------------------------------------------------------------------------------------------------------------------------------------------------------------------------------------------------------------------------------------------------------------------------------------------|
| Type of Submission:     | Initial Study                                                                                                                                                                                                                                                                                                                                                                                                                                                                                                                                                                                                                                                                                                                                                                                                                                                                                        |
| Review Level:           | Expedited                                                                                                                                                                                                                                                                                                                                                                                                                                                                                                                                                                                                                                                                                                                                                                                                                                                                                            |
| Expedited Category:     | - (5) Data, documents, records, or specimens<br>- (6) Voice, video, digital, or image recordings<br>- (7) Behavioral research/social science methods                                                                                                                                                                                                                                                                                                                                                                                                                                                                                                                                                                                                                                                                                                                                                 |
| Title of Study:         | Implementation Preparation of a Population Panel Management Intervention in Safety-Net Clinics for Childhood Hypertension                                                                                                                                                                                                                                                                                                                                                                                                                                                                                                                                                                                                                                                                                                                                                                            |
| Principal Investigator: | Justin Smith                                                                                                                                                                                                                                                                                                                                                                                                                                                                                                                                                                                                                                                                                                                                                                                                                                                                                         |
| IRB ID:                 | STU00210809                                                                                                                                                                                                                                                                                                                                                                                                                                                                                                                                                                                                                                                                                                                                                                                                                                                                                          |
| Funding Source:         | Name: National Heart, Lung, and Blood Institute                                                                                                                                                                                                                                                                                                                                                                                                                                                                                                                                                                                                                                                                                                                                                                                                                                                      |
| IND, IDE, or HDE:       | None                                                                                                                                                                                                                                                                                                                                                                                                                                                                                                                                                                                                                                                                                                                                                                                                                                                                                                 |
| Documents Reviewed:     | <ul style="list-style-type: none"> <li>• SUS_scale.pdf, Category: Questionnaire/Survey;</li> <li>• Optimize_Parent-Permission-with-Child-Assent-CONSENT_3.22.20.docx, Category: Consent Form;</li> <li>• Optimize Flyers Parent Youth_1.27.20.pdf, Category: Recruitment Materials;</li> <li>• Optimize_Parent-Permission-CONSENT_3.22.20.docx, Category: Consent Form;</li> <li>• IRB_Smith NHLBIR01_protocol_3.22.20.docx, Category: IRB Protocol;</li> <li>• Stakeholder Panel Recruitment Letter_2.17.20.docx, Category: Recruitment Materials;</li> <li>• Usability Testing Recruitment Letter_2.17.20.docx, Category: Recruitment Materials;</li> <li>• BP SEW survey_1.27.20 FINAL.docx, Category: Questionnaire/Survey;</li> <li>• stakeholder panel consent_Smith_3.6.20.docx, Category: Consent Form;</li> <li>• phy survey online-consent_Smith English_3.6.20.docx, Category:</li> </ul> |

|                           |                                                                                                                                                                                                                                                                                                                                |
|---------------------------|--------------------------------------------------------------------------------------------------------------------------------------------------------------------------------------------------------------------------------------------------------------------------------------------------------------------------------|
|                           | Consent Form;<br>• Optimize usability session consent_3.6.20.docx, Category: Consent Form;<br>• Optimize_Child Assent_3.23.20.docx, Category: Consent Form;<br>• phy survey online Recruitment Letter_2.17.20.docx, Category: Recruitment Materials;<br>• OpTIMISe Dyad Interview Questions_2.18.20.docx, Category: Interview; |
| Special Determination(s): | Children;                                                                                                                                                                                                                                                                                                                      |

In conducting this study, you are required to follow the requirements listed in the Northwestern University (NU) Investigator Manual ([HRP-103](#)), which can be found by navigating to the policy section of the IRB website. Additionally, as Principal Investigator (PI) of this research study, you are expected to adhere to the investigator responsibilities outlined in the “What are my obligations as Investigator in order to conduct Human Research” section of the Investigator Manual ([HRP-103](#)).

If your study is a clinical trial, there are additional requirements including trial registration and results reporting on ClinicalTrials.gov. Federally-funded clinical trials are also required to post one IRB approved consent form, used during enrollment, on a publicly available federal website such as ClinicalTrials.gov. Please visit the [clinical trials page](#) on the IRB website for more information. If you would like an account created or need other assistance with ClinicalTrials.gov, please email [clinicaltrials.gov@northwestern.edu](mailto:clinicaltrials.gov@northwestern.edu).

An annual continuing review is not required for this project. The study team must still submit: modifications for project changes; RNIs (reportable new information); and a Continuing Review to close the project when it ends (for guidance on when a project can be closed, see [GUIDANCE on Study Closure – HRP-1901](#)).

NU IRB approval does not constitute or guarantee institutional approval and/or support. Investigators and study team members must comply with all applicable federal, state, and local laws, as well as NU Policies and Procedures, which may include obtaining approval for your research activities from other individuals or entities.

For IRB-related questions, please consult the NU IRB website at <http://irb.northwestern.edu>. For general research questions, please consult the NU Office for Research website at [www.research.northwestern.edu](http://www.research.northwestern.edu).

Additionally, please note that the analyst who you worked with during the initial review and approval of your study is not the analyst that is responsible for the review of any subsequent modifications, continuing reviews, or RNIs. As such, please direct any further questions about modifications, continuing reviews, or RNIs to the analyst assigned to the subsequent submission.
